# Supplementary material for: Stool consistency is strongly associated with gut microbiota richness and composition, enterotypes and bacterial growth rates
Source: HighWire-hosted journal article supplement (doi:10.1136/gutjnl-2015-309618), 2015-06-11
Supplement: gutjnl-2015-309618supp.pdf [file gutjnl-2015-309618supp.pdf]

## SUPPLEMENTARY FIGURES & TABLES

Figures S1-S6

Tables S1-S5

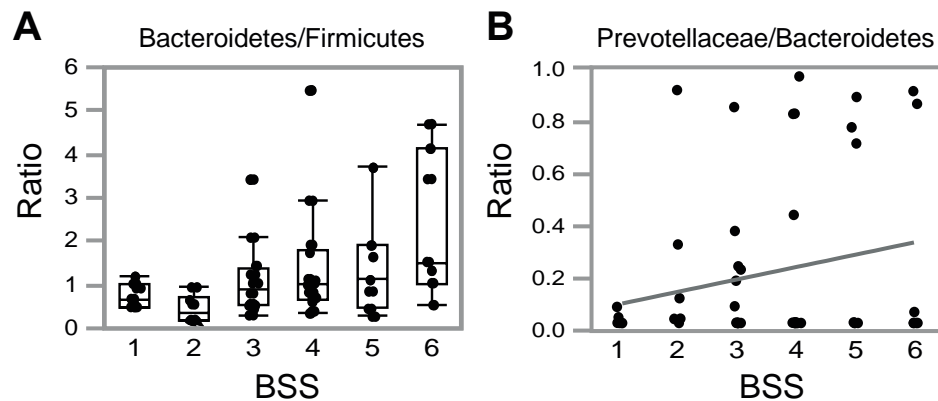

**Supplementary Figure 1: Correlation between stool consistency and the Firmicutes/Bacteroidetes and Prevotellaceae/Bacteroidetes abundance ratios.**

Both the Firmicutes/Bacteroidetes and Prevotellaceae/Bacteroidetes abundance ratios were proposed before as alternative to enterotyping. A) The Firmicutes/Bacteroidetes abundance ratio is significantly correlated with stool consistency (BSS) ( $\rho=0.42$ ,  $p$ -value=0.001). B) The Prevotellaceae/Bacteroidetes abundance ratio clearly separates the Prevotella-enterotype samples from the others and does not correlate with stool consistency (BSS) ( $\rho=-0.04$ ,  $p$ -value=0.77).

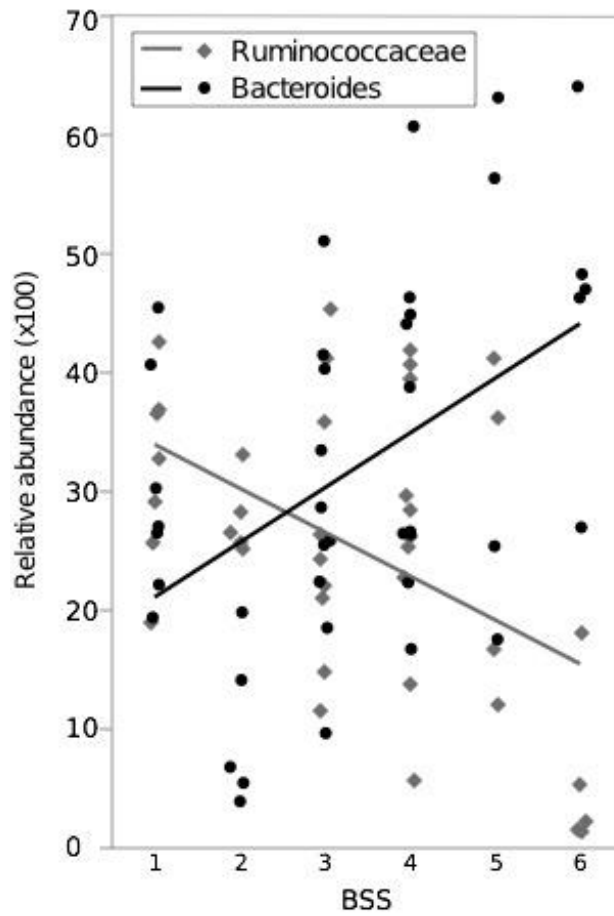

**Supplementary Figure 2: Ruminococcaceae and *Bacteroides* abundance show opposite correlations with stool consistency in the RB enterotype.**

Correlation between stool consistency and the relative abundances of Ruminococcaceae (BSS) ( $\rho=-0.37$ ,  $p\text{-value}=0.016$ ) and of *Bacteroides* ( $\rho=0.43$ ,  $p\text{-value}=0.004$ ) in the RB-enterotype.

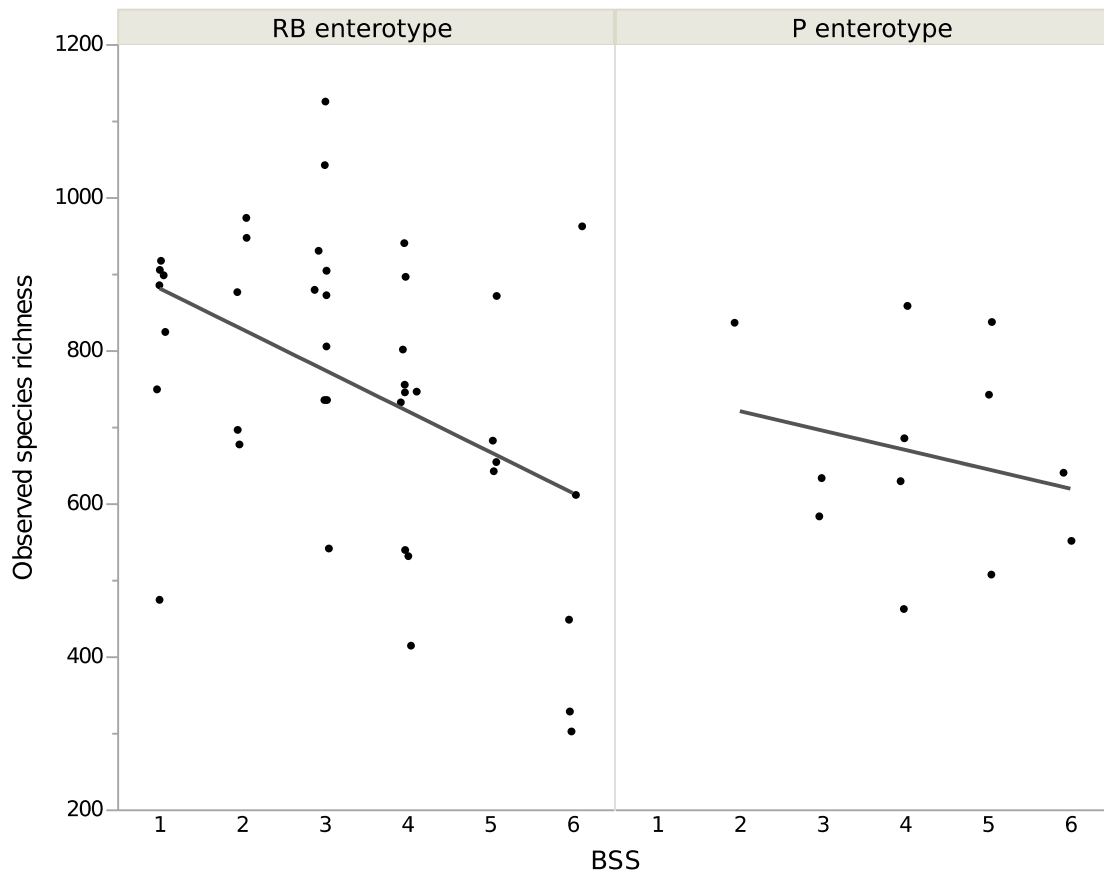

**Supplementary Figure 3: Within an enterotype, low richness samples are more abundant with faster transit.** Correlation between observed species richness and stool consistency (BSS) in the RB enterotype ( $\rho = -0.43$ ,  $p\text{-value} = 0.004$ ) and the P enterotype ( $\rho = -0.12$ ,  $p\text{-value} = 0.7$ ).

A

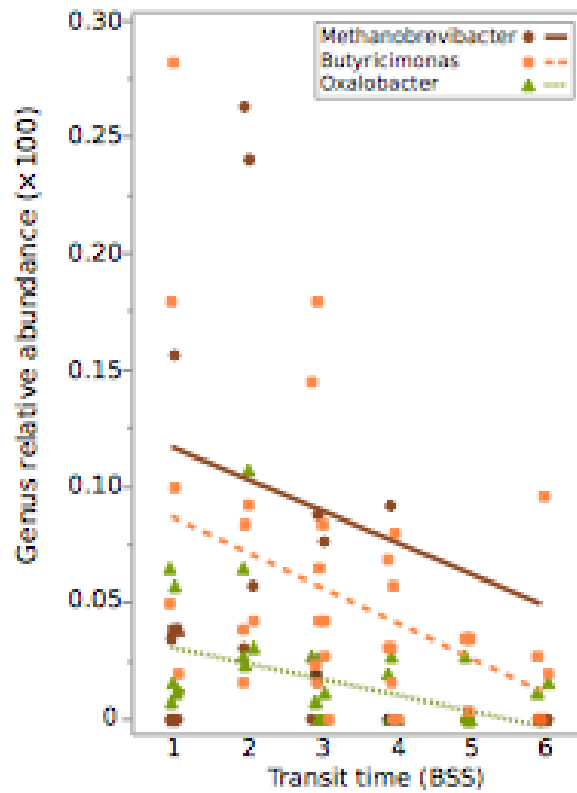

B

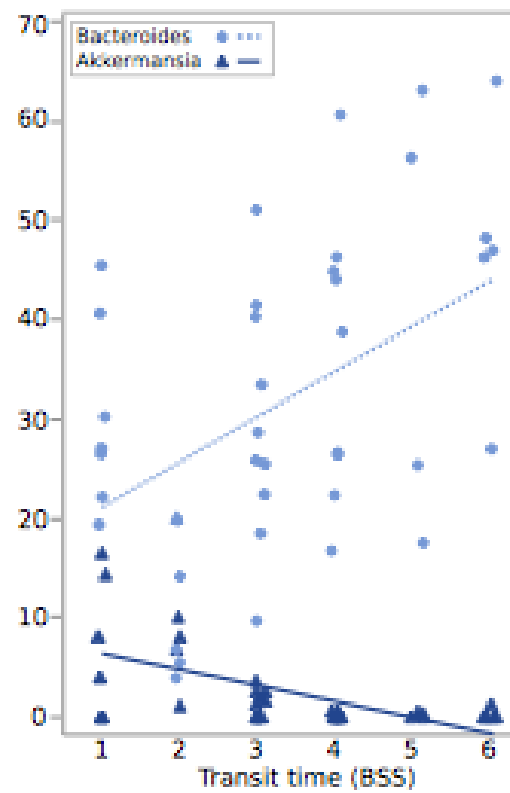

**Supplementary Figure 4: Genera significantly correlated with stool consistency in the Ruminococcaceae-Bacteroides enterotype.** A) Relative abundance of *Methanobrevibacter*, *Oxalobacter* and *Butyricimonas* in the RB-enterotype (respectively,  $\rho=-0.10$ ,  $q\text{-value}=0.072$ ;  $\rho=-0.46$ ,  $q\text{-value}=0.035$ ;  $\rho=-0.41$ ,  $q\text{-value}=0.072$ ). B) Relative abundance of *Akkermansia* and *Bacteroides* in the RB-enterotype (respectively:  $\rho=0.46$ ,  $q\text{-value}=0.072$ ;  $\rho=-0.53$ ,  $q\text{-value}=0.034$ ).

A

B

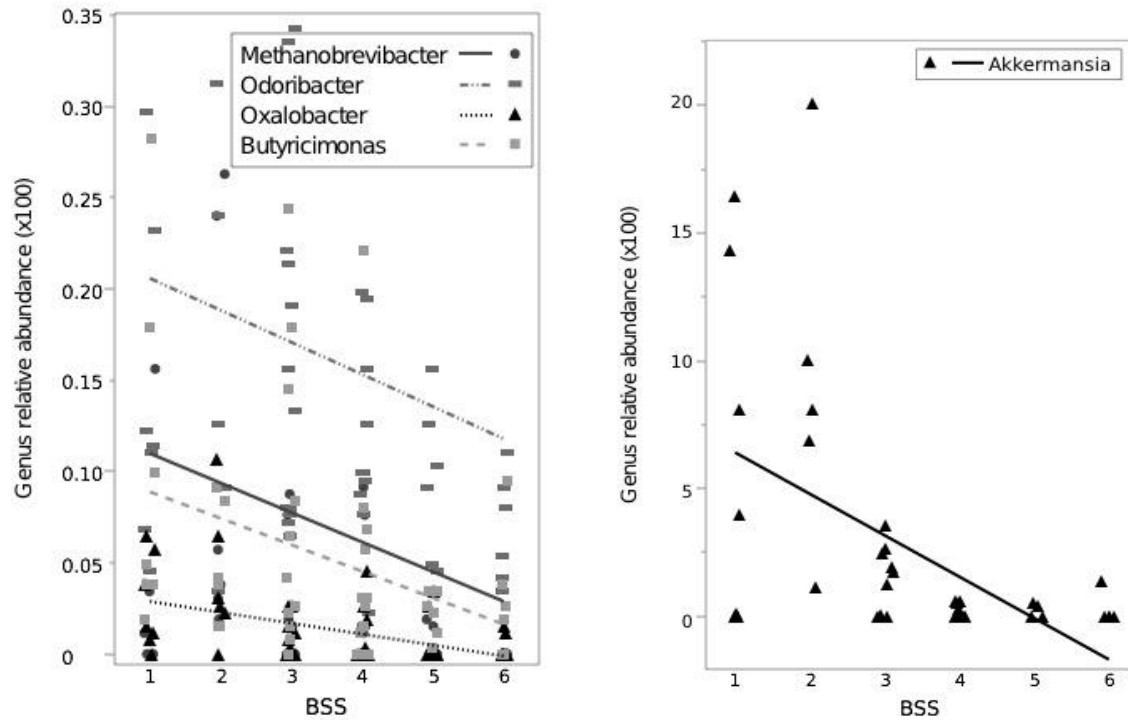

**Supplementary Figure 5: Genera abundances significantly correlated with stool consistency in the total dataset.** A) Relative abundance of *Methanobrevibacter*, *Oxalobacter*, *Butyricimonas* and *Odoribacter* in the total dataset (respectively:  $\rho=-0.10$ ,  $q\text{-value}=0.072$ ;  $\rho=-0.46$ ,  $q\text{-value}=0.035$ ;  $\rho=-0.41$ ,  $q\text{-value}=0.072$ ). B) Relative abundance of *Akkermansia* in the total dataset ( $\rho=0.50$ ,  $q\text{-value}=0.072$ ).

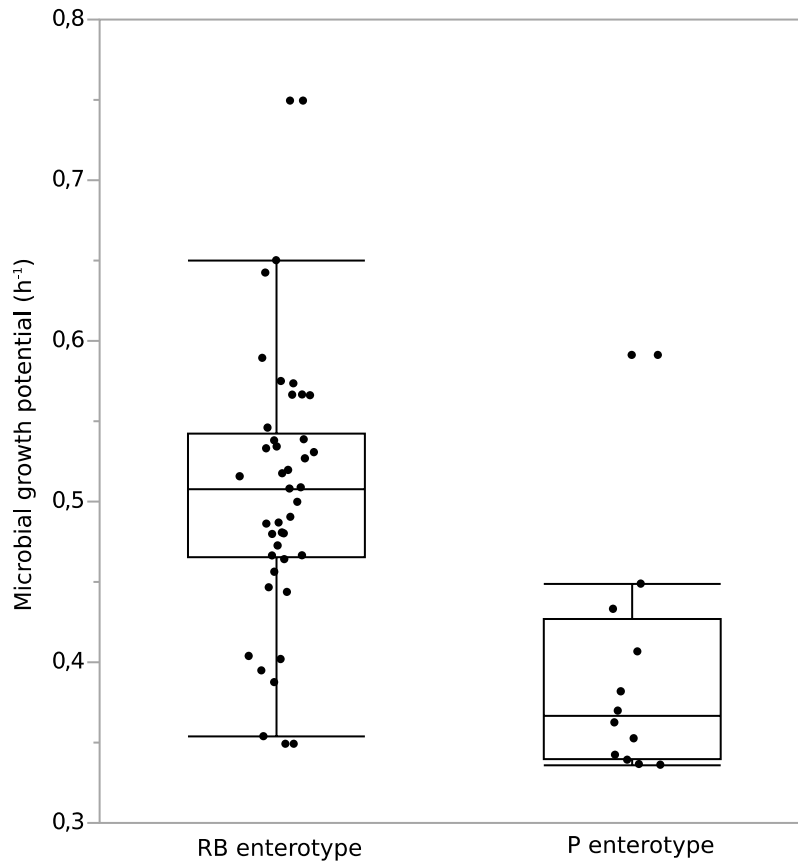

**Supplementary Figure 6: Microbiota growth potential in the RB- and P enterotype.** On average, microbiota growth potentials of the P enterotype samples are lower than those of the RB samples (median microbiota growth potential 0.38 h<sup>-1</sup> vs. 0.52 h<sup>-1</sup>, respectively). Significance of differences in microbiota growth potential between enterotypes was assessed by Wilcoxon signed rank test (p-value < 10<sup>-4</sup>).

**Supplementary Figure 7: Characteristics of the non-IBS cohort.** Distribution of the enterotypes of the non-IBS participants over the BSS scores (A), Observed and estimated richness of the non-IBS participants over BSS scores (B), and distribution of the non-IBS participants and IBS patients over the BSS scores (C).

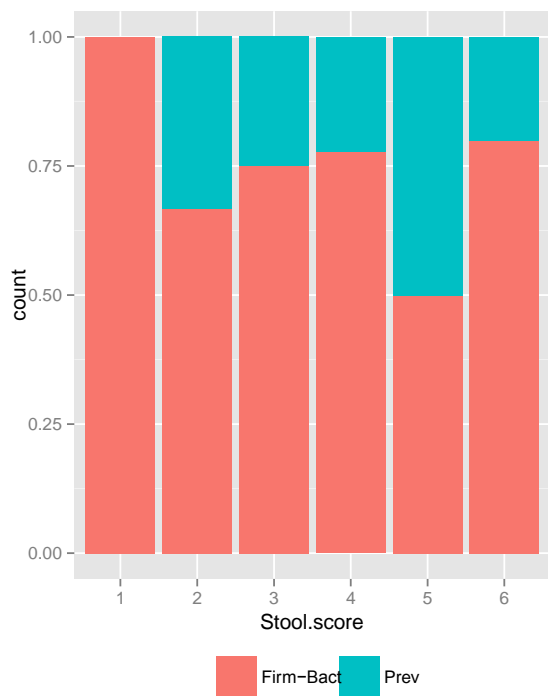

**A.** Distribution of the enterotypes over BSS scores in non-IBS participants.

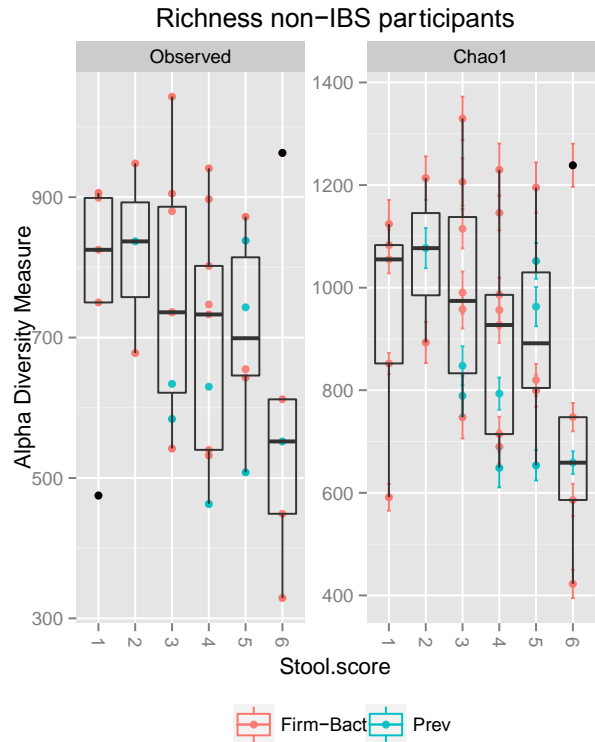

**B.** Observed and estimated richness over BSS scores in non-IBS participants.

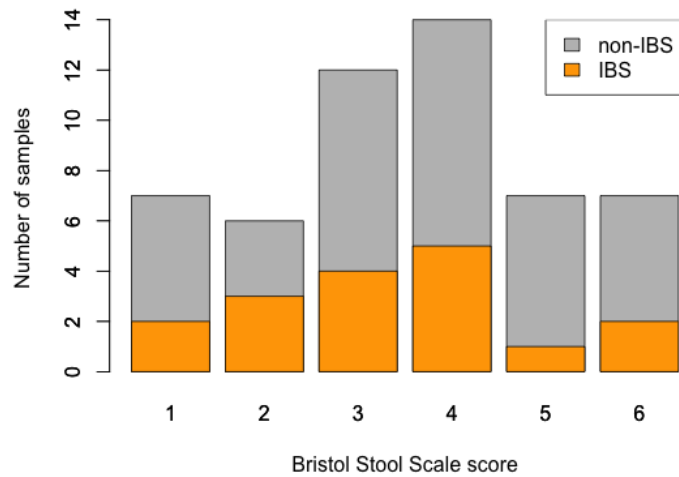

**C.** Distribution of the non-IBS participants and IBS patients over the BSS scores.

**Supplementary Figure 8: Characteristics of a male cohort.** A male cohort of 24 individuals - fulfilling the inclusion criteria as in the main cohort - with BSS stool scores equally distributed over the BSS scores (4 samples / BSS category) was analyzed for observed and estimated richness over BSS scores (A), and the distribution of the enterotypes over the BSS scores (B).

Fecal samples were frozen at  $-20^{\circ}\text{C}$  immediately after collection by the participants. After frozen transport to a collection point in their neighborhood and subsequent transport on dry ice, samples were stored at  $-80^{\circ}\text{C}$  within 72 hours after delivery at the collection point until DNA extraction. Samples were extracted using the PowerMicrobiome RNA isolation kit (Mobio), with the following adjustments to the protocol: (1) an incubation step of 10 minutes at  $90^{\circ}\text{C}$  after bead beating, (2) Steps to remove DNA were not executed.

The V4 region of the 16S rRNA gene was amplified with primer pair 515F and 806R, with single multiplex identifier (MID) and adaptors as described by Kozich *et al.* [1]. Sequencing was performed using Illumina MiSeq sequencer and sequencing kit MiSeq V2 to produce 250 bp pair-end reads. After de-multiplexing, fastq sequences were merged using FLASH [2] software with default parameters, and successfully combined reads were filtered based on quality (>90% of nucleotides must have quality score 30 or higher for every read) using Fastx tool kit ([http://hannonlab.cshl.edu/fastx\\_toolkit/](http://hannonlab.cshl.edu/fastx_toolkit/)). Chimeras were removed using UCHIME [3] and each sample was standardized to 3,000 reads using random selection of reads. The taxonomy of reads was determined using RDP classifier [4] and taxonomy tables for phylum to genus level were created using Perl scripts.



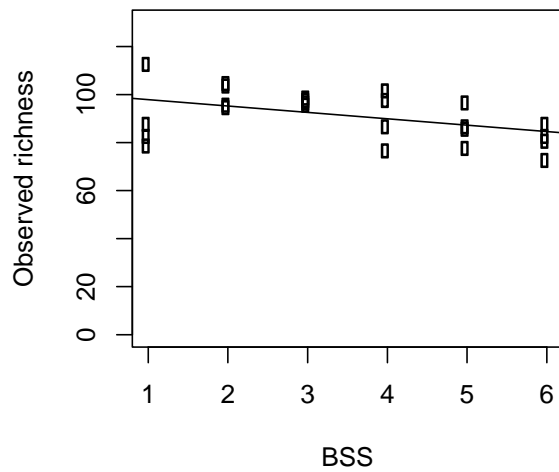

**A** Richness over BSS in 24 male individuals.

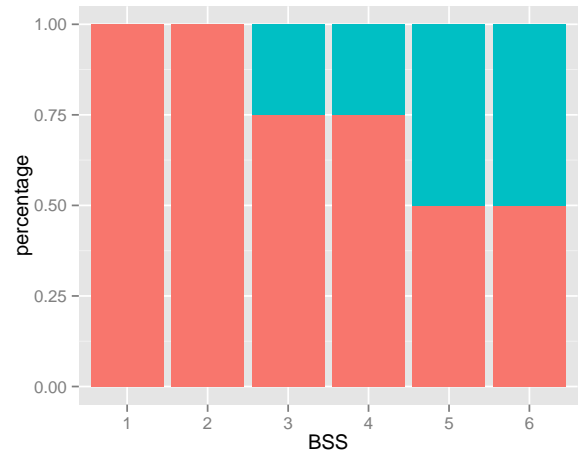

**B** Enterotypes Ruminococcaceae-Bacteroides (Red) and Prevotella (Blue) over BSS in 24 male individuals.

**Supplementary Table 1.** Description of the 53 individuals (individ.) in this study: age, self-reported dietary restrictions (diet), digestive system disorders as reported by their GI and their self-indicated sample Bristol Stool Scale (BSS) score. None of the participants ingested diarrhea inhibitors, laxatives or probiotics in the week prior to sample collection, nor antibiotics within the three months before sampling. None of the participants had inflammatory bowel disease (IBD). Some reported irritable bowel syndrome (IBS), celiac disease (individ. 6), gallstones, lactose intolerance and other gastrointestinal problems. One participant was diabetic (individ. 16).

|           | <b>Diet</b>      | <b>BSS</b> | <b>Age</b> | <b>Digestive system disorders</b>        |
|-----------|------------------|------------|------------|------------------------------------------|
| <b>1</b>  | Vegetarian       | 4          | 50         | IBS                                      |
| <b>2</b>  | NA               | 3          | 26         | no digestive system disorder             |
| <b>3</b>  | None             | 5          | 49         | no digestive system disorder             |
| <b>4</b>  | None             | 2          | 45         | IBS                                      |
| <b>5</b>  | None             | 6          | 27         | IBS                                      |
| <b>6</b>  | Glutenfree diet  | 3          | 33         | other digestive system disorder (no IBD) |
| <b>7</b>  | Vegetarian       | 1          | 44         | no digestive system disorder             |
| <b>8</b>  | Lactosefree diet | 6          | 46         | IBS                                      |
| <b>9</b>  | None             | 2          | 53         | no digestive system disorder             |
| <b>10</b> | Vegetarian       | 5          | 38         | no digestive system disorder             |
| <b>11</b> | None             | 3          | 34         | IBS                                      |

|           |                  |   |    |                                          |
|-----------|------------------|---|----|------------------------------------------|
| <b>12</b> | None             | 1 | 50 | no digestive system disorder             |
| <b>13</b> | Flexitarian      | 4 | 27 | no digestive system disorder             |
| <b>14</b> | None             | 4 | 35 | other digestive system disorder (no IBD) |
| <b>15</b> | Vegetarian       | 4 | 46 | no digestive system disorder             |
| <b>16</b> | low salt diet    | 3 | 43 | no digestive system disorder             |
| <b>17</b> | Vegetarian       | 5 | 20 | no digestive system disorder             |
| <b>18</b> | Vegetarian       | 6 | 43 | no digestive system disorder             |
| <b>19</b> | Flexitarian      | 6 | 43 | no digestive system disorder             |
| <b>20</b> | None             | 4 | 39 | no digestive system disorder             |
| <b>21</b> | None             | 5 | 25 | no digestive system disorder             |
| <b>22</b> | None             | 4 | 44 | no digestive system disorder             |
| <b>23</b> | None             | 3 | 28 | IBS                                      |
| <b>24</b> | Vegetarian       | 6 | 22 | no digestive system disorder             |
| <b>25</b> | Protein diet     | 6 | 43 | other digestive system disorder (no IBD) |
| <b>26</b> | None             | 5 | 39 | IBS                                      |
| <b>27</b> | Glutenfree diet  | 1 | 55 | other digestive system disorder (no IBD) |
| <b>28</b> | None             | 3 | 23 | no digestive system disorder             |
| <b>29</b> | None             | 3 | 28 | no digestive system disorder             |
| <b>30</b> | None             | 1 | 52 | no digestive system disorder             |
| <b>31</b> | None             | 2 | 52 | other digestive system disorder (no IBD) |
| <b>32</b> | low salt diet    | 4 | 45 | no digestive system disorder             |
| <b>33</b> | None             | 1 | 48 | no digestive system disorder             |
| <b>34</b> | Lactosefree diet | 4 | 32 | IBS                                      |
| <b>35</b> | None             | 2 | 47 | IBS                                      |
| <b>36</b> | Vegetarian       | 4 | 31 | no digestive system disorder             |
| <b>37</b> | None             | 3 | 47 | no digestive system disorder             |
| <b>38</b> | None             | 5 | 47 | no digestive system disorder             |
| <b>39</b> | Flexitarian      | 3 | 35 | no digestive system disorder             |
| <b>40</b> | None             | 2 | 46 | no digestive system disorder             |
| <b>41</b> | weight loss diet | 3 | 28 | IBS                                      |
| <b>42</b> | None             | 4 | 25 | no digestive system disorder             |
| <b>43</b> | None             | 3 | 42 | IBS                                      |
| <b>44</b> | None             | 4 | 45 | IBS                                      |
| <b>45</b> | None             | 6 | 40 | no digestive system disorder             |
| <b>46</b> | Lactosefree diet | 4 | 42 | IBS                                      |
| <b>47</b> | None             | 1 | 55 | IBS                                      |
| <b>48</b> | None             | 1 | 50 | IBS                                      |
| <b>49</b> | Glutenfree diet  | 2 | 55 | IBS                                      |
| <b>50</b> | Vegetarian       | 3 | 30 | no digestive system disorder             |
| <b>51</b> | Lactosefree diet | 4 | 40 | IBS                                      |
| <b>52</b> | None             | 5 | 27 | no digestive system disorder             |
| <b>53</b> | None             | 4 | 36 | no digestive system disorder             |

**Supplementary Table 2.** Enterotyping of the 53 samples. Clustering of the samples into enterotypes was performed by either PAM clustering with JSD distance or Dirichlet multinomial mixtures.

| Participant | JSD (2) | DMM (2) | JSD (3) |
|-------------|---------|---------|---------|
| 1           | P       | F-B     | R       |
| 2           | F-B     | F-B     | B       |
| 3           | P       | P       | P       |
| 4           | F-B     | F-B     | R       |
| 5           | P       | P       | P       |
| 6           | F-B     | F-B     | B       |
| 7           | F-B     | F-B     | R       |
| 8           | F-B     | F-B     | B       |
| 9           | F-B     | F-B     | R       |
| 10          | P       | P       | P       |
| 11          | F-B     | F-B     | B       |
| 12          | F-B     | F-B     | R       |
| 13          | F-B     | F-B     | B       |
| 14          | F-B     | F-B     | B       |
| 15          | F-B     | F-B     | B       |
| 16          | F-B     | F-B     | R       |
| 17          | F-B     | F-B     | B       |
| 18          | P       | P       | P       |
| 19          | F-B     | F-B     | B       |
| 20          | P       | P       | P       |
| 21          | F-B     | F-B     | B       |
| 22          | P       | P       | P       |
| 23          | F-B     | F-B     | B       |
| 24          | F-B     | F-B     | B       |
| 25          | F-B     | F-B     | B       |
| 26          | F-B     | F-B     | B       |
| 27          | F-B     | F-B     | B       |
| 28          | F-B     | F-B     | B       |
| 29          | P       | P       | P       |
| 30          | F-B     | F-B     | B       |
| 31          | P       | P       | P       |
| 32          | F-B     | F-B     | B       |
| 33          | F-B     | F-B     | R       |
| 34          | P       | P       | P       |
| 35          | F-B     | F-B     | R       |
| 36          | F-B     | F-B     | B       |
| 37          | P       | P       | P       |
| 38          | P       | P       | P       |
| 39          | F-B     | F-B     | B       |

|    |     |     |   |
|----|-----|-----|---|
| 40 | F-B | F-B | R |
| 41 | F-B | F-B | B |
| 42 | F-B | F-B | B |
| 43 | F-B | F-B | R |
| 44 | F-B | F-B | B |
| 45 | F-B | F-B | B |
| 46 | F-B | F-B | B |
| 47 | F-B | F-B | B |
| 48 | F-B | F-B | B |
| 49 | F-B | F-B | R |
| 50 | F-B | F-B | B |
| 51 | F-B | F-B | B |
| 52 | F-B | F-B | B |
| 53 | F-B | F-B | B |

PAM clustering was performed as originally described on <http://enterotyping.embl.de> were used. The dataset separated optimally into two clusters as determined by the Calinski-Harabasz index and clusters were assigned the enterotype Ruminococcaceae-Bacteroides or Prevotella, based on the taxa dominating the enterotype as in the original article of Arumugam *et al.* (2011). Additionally we clustered the dataset with the same method into three enterotypes, and named them as in the original article Ruminococcaceae (R), Bacteroides (B) and Prevotella (P), again based on the taxa dominating the enterotype.

Clustering of the dataset with Dirichlet multinomial mixtures (DMM) was performed using the DirichletMultinomial 1.6.0 package in R. Laplace was used to penalize model complexity and indicated an optimal separation of the dataset into two clusters. Naming of the clusters was identical as with the PAM clustering method. All except one sample got assigned the same enterotype as with the PAM clustering method

**Supplementary Table 3.** Non-parametric Spearman correlation between stool consistency (BSS) and genera abundances, after multiple testing correction (Benjamini-Hochberg, q-values). Dataset with de novo OTU assignment.

| Phylum          | Genus           | N samples | total dataset |         | RB enterotype |         | P enterotype |         |
|-----------------|-----------------|-----------|---------------|---------|---------------|---------|--------------|---------|
|                 |                 |           | rho           | q_value | rho           | q_value | rho          | q_value |
| Firmicutes      | [Eubacterium]   | 30        | -0.28         | 0.4072  | -0.401        | 0.1434  | 0.048        | 0.9925  |
| Bacteroidetes   | [Prevotella]    | 13        | 0.018         | 0.9628  | 0.106         | 0.8861  | -0.246       | 0.8279  |
| Firmicutes      | [Ruminococcus]  | 53        | 0.028         | 0.6905  | 0.144         | 0.9519  | -0.541       | 0.1487  |
| Firmicutes      | 5-7N15          | 4         | 0.016         | 0.4768  | 0.047         | 0.5447  | NA           | NA      |
| Proteobacteria  | Acetobacter     | 1         | 0.041         | 0.929   | 0.067         | 0.7842  | NA           | NA      |
| Firmicutes      | Acidaminococcus | 10        | -0.099        | 0.9124  | -0.11         | 0.3811  | 0.199        | 0.7594  |
| Actinobacteria  | Actinomyces     | 15        | -0.022        | 0.6905  | 0.069         | 0.9242  | -0.451       | 0.6991  |
| Actinobacteria  | Adlercreutzia   | 7         | -0.213        | 0.4104  | -0.178        | 0.5447  | -0.48        | 0.3926  |
| Proteobacteria  | Aggregatibacter | 6         | 0.112         | 0.8738  | 0.09          | 0.5787  | 0.453        | 0.3656  |
| Verrucomicrobia | Akkermansia     | 41        | -0.504        | 0.0722  | -0.528        | 0.0342  | -0.078       | 0.6696  |
| Firmicutes      | Anaerococcus    | 1         | -0.232        | 0.4104  | -0.238        | 0.3726  | NA           | NA      |
| Firmicutes      | Anaerostipes    | 47        | -0.272        | 0.334   | -0.202        | 0.5667  | -0.366       | 0.7978  |
| Firmicutes      | Anaerotruncus   | 23        | -0.214        | 0.4426  | -0.188        | 0.5667  | -0.118       | 0.7803  |
| Bacteroidetes   | Bacteroides     | 53        | 0.177         | 0.6134  | 0.46          | 0.0718  | -0.048       | 0.7803  |
| Actinobacteria  | Bifidobacterium | 43        | -0.073        | 0.9628  | -0.044        | 0.9519  | 0.234        | 0.6145  |
| Proteobacteria  | Bilophila       | 48        | -0.106        | 0.6905  | -0.077        | 0.7795  | 0.26         | 0.8375  |
| Firmicutes      | Blautia         | 53        | 0.253         | 0.8072  | 0.448         | 0.1401  | -0.341       | 0.6127  |
| Firmicutes      | Bulleidia       | 5         | -0.088        | 0.9784  | 0.106         | 0.4879  | -0.638       | 0.1489  |
| Bacteroidetes   | Butyricimonas   | 44        | -0.348        | 0.0722  | -0.406        | 0.0718  | -0.264       | 0.862   |

|                |                  |    |        |        |        |        |        |        |
|----------------|------------------|----|--------|--------|--------|--------|--------|--------|
| Firmicutes     | Butyrivibrio     | 2  | 0.028  | 0.9735 | 0.057  | 0.9416 | NA     | NA     |
| Proteobacteria | Campylobacter    | 4  | 0.08   | 0.4072 | 0.115  | 0.2232 | NA     | NA     |
| Firmicutes     | Catenibacterium  | 6  | 0.039  | 0.6394 | -0.033 | 0.9416 | 0.154  | 0.8279 |
| Firmicutes     | cc_115           | 21 | -0.351 | 0.334  | -0.35  | 0.2228 | -0.084 | 0.8375 |
| Bacteroidetes  | CF231            | 2  | -0.05  | 0.9735 | -0.035 | 0.9416 | NA     | NA     |
| Firmicutes     | Christensenella  | 7  | -0.09  | 0.4426 | -0.045 | 0.6214 | -0.394 | 0.4488 |
| Firmicutes     | Clostridium      | 48 | -0.183 | 0.169  | -0.166 | 0.1693 | -0.246 | 0.8375 |
| Actinobacteria | Collinsella      | 39 | -0.122 | 0.4072 | -0.064 | 0.4028 | -0.456 | 0.6991 |
| Firmicutes     | Coprobacillus    | 11 | 0.169  | 0.9628 | 0.225  | 0.7795 | NA     | NA     |
| Firmicutes     | Coprococcus      | 53 | -0.112 | 0.8053 | -0.07  | 0.7842 | -0.407 | 0.6991 |
| Firmicutes     | Dehalobacterium  | 24 | -0.278 | 0.2954 | -0.28  | 0.2232 | 0.043  | 0.5769 |
| Proteobacteria | Desulfovibrio    | 30 | -0.121 | 0.588  | -0.26  | 0.3726 | -0.102 | 0.6696 |
| Firmicutes     | Dialister        | 31 | 0.166  | 0.6904 | 0.015  | 0.9288 | 0.34   | 0.4888 |
| Firmicutes     | Dorea            | 53 | -0.16  | 0.169  | -0.113 | 0.3722 | -0.288 | 0.1618 |
| Actinobacteria | Eggerthella      | 9  | 0.006  | 0.6922 | 0.022  | 0.6372 | 0.194  | 0.7004 |
| Firmicutes     | Faecalibacterium | 53 | -0.08  | 0.6898 | -0.059 | 0.5787 | 0.112  | 0.7247 |
| Fusobacteria   | Fusobacterium    | 10 | 0.221  | 0.9505 | 0.269  | 0.6417 | -0.324 | 0.4888 |
| Proteobacteria | Haemophilus      | 39 | 0.232  | 0.2843 | 0.302  | 0.1434 | 0.338  | 0.6696 |
| Firmicutes     | Holdemania       | 28 | -0.032 | 0.6898 | 0.013  | 0.7842 | 0.131  | 0.8375 |
| Firmicutes     | Lachnobacterium  | 15 | -0.122 | 0.9628 | -0.086 | 0.7145 | -0.065 | 0.8551 |
| Firmicutes     | Lachnospira      | 52 | 0.179  | 0.8072 | 0.272  | 0.5667 | -0.291 | 0.2688 |
| Firmicutes     | Lactobacillus    | 17 | 0.102  | 0.6111 | 0.113  | 0.5667 | 0.175  | 0.9292 |
| Firmicutes     | Lactococcus      | 10 | -0.049 | 0.5836 | 0.098  | 0.9288 | -0.583 | 0.2897 |
| Firmicutes     | Megamonas        | 4  | 0.164  | 0.4104 | -0.035 | 0.9242 | 0.401  | 0.2688 |

|                |                                  |    |        |        |        |        |        |        |
|----------------|----------------------------------|----|--------|--------|--------|--------|--------|--------|
| Firmicutes     | Megasphaera                      | 2  | 0.009  | 0.9735 | 0.067  | 0.7842 | -0.324 | 0.4888 |
| Euryarchaeota  | Methanobrevibacter               | 21 | -0.126 | 0.0722 | -0.095 | 0.0718 | -0.134 | 0.7978 |
| Euryarchaeota  | Methanosphaera                   | 4  | -0.305 | 0.0966 | -0.307 | 0.1318 | NA     | NA     |
| Firmicutes     | Mitsuokella                      | 3  | 0.133  | 0.8072 | 0.044  | 0.9416 | 0.194  | 0.7004 |
| Proteobacteria | Neisseria                        | 4  | 0.169  | 0.6905 | 0.231  | 0.5667 | 0      | 0      |
| Bacteroidetes  | Odoribacter                      | 51 | -0.094 | 0.0966 | -0.048 | 0.2232 | -0.284 | 0.8551 |
| Firmicutes     | Oribacterium                     | 2  | -0.006 | 0.9735 | 0.023  | 0.9416 | NA     | NA     |
| Firmicutes     | Oscillospira                     | 53 | -0.237 | 0.1502 | -0.22  | 0.2028 | -0.107 | 0.4888 |
| Proteobacteria | Oxalobacter                      | 25 | -0.424 | 0.0722 | -0.46  | 0.035  | -0.051 | 0.6127 |
| Firmicutes     | p-75-a5                          | 1  | -0.05  | 0.8701 | NA     | NA     | -0.324 | 0.4888 |
| Bacteroidetes  | Parabacteroides                  | 51 | -0.012 | 0.4072 | 0.051  | 0.5447 | -0.101 | 0.7456 |
| Bacteroidetes  | Paraprevotella                   | 24 | 0.124  | 0.9735 | 0.142  | 0.9679 | 0.222  | 0.8639 |
| Firmicutes     | Pediococcus                      | 2  | 0.095  | 0.4426 | 0.27   | 0.3726 | -0.065 | 0.8551 |
| Firmicutes     | Peptococcus                      | 6  | -0.038 | 0.9966 | -0.017 | 0.8874 | -0.206 | 0.8639 |
| Firmicutes     | Peptoniphilus                    | 2  | -0.149 | 0.4318 | -0.139 | 0.483  | NA     | NA     |
| Firmicutes     | Peptostreptococcus               | 2  | 0.04   | 0.9784 | 0.074  | 0.9519 | NA     | NA     |
| Firmicutes     | Phascolarctobacterium            | 31 | -0.057 | 0.9735 | -0.004 | 0.8053 | -0.369 | 0.4888 |
| Bacteroidetes  | Porphyromonas                    | 11 | -0.274 | 0.4104 | -0.29  | 0.3617 | 0.03   | 0.862  |
| Bacteroidetes  | Prevotella                       | 50 | 0.265  | 0.9735 | -0.153 | 0.1463 | 0.342  | 0.4749 |
| Proteobacteria | Proteus                          | 1  | 0.223  | 0.4104 | 0.27   | 0.3726 | NA     | NA     |
| Proteobacteria | Pseudomonas                      | 2  | -0.041 | 0.9735 | -0.021 | 0.9416 | NA     | NA     |
| Firmicutes     | Pseudoramibacter_<br>Eubacterium | 4  | -0.038 | 0.9628 | -0.002 | 0.9519 | NA     | NA     |
| Proteobacteria | Ralstonia                        | 1  | 0.041  | 0.929  | 0.067  | 0.7842 | NA     | NA     |

|                |                 |    |        |        |        |        |        |        |
|----------------|-----------------|----|--------|--------|--------|--------|--------|--------|
| Firmicutes     | rc4-4           | 16 | -0.125 | 0.6134 | -0.085 | 0.4028 | -0.49  | 0.7803 |
| Firmicutes     | RFN20           | 1  | -0.141 | 0.5836 | -0.136 | 0.5787 | NA     | NA     |
| Bacteroidetes  | Rikenella       | 2  | 0.05   | 0.4426 | 0.078  | 0.3726 | NA     | NA     |
| Firmicutes     | Roseburia       | 53 | 0.208  | 0.4426 | 0.299  | 0.1434 | -0.458 | 0.2593 |
| Actinobacteria | Rothia          | 1  | -0.232 | 0.4104 | -0.238 | 0.3726 | NA     | NA     |
| Firmicutes     | Ruminococcus    | 53 | -0.215 | 0.371  | -0.211 | 0.2232 | 0.252  | 0.704  |
| Proteobacteria | Serratia        | 8  | -0.024 | 0.9735 | -0.03  | 0.7909 | 0.128  | 0.7978 |
| Actinobacteria | Slackia         | 8  | -0.339 | 0.334  | -0.338 | 0.3621 | NA     | NA     |
| Fusobacteria   | Sneathia        | 1  | -0.232 | 0.4104 | -0.238 | 0.3726 | NA     | NA     |
| Firmicutes     | Streptococcus   | 43 | 0.308  | 0.4072 | 0.385  | 0.3609 | -0.124 | 0.9715 |
| Firmicutes     | Succiniclaticum | 8  | -0.13  | 0.9735 | -0.108 | 0.9679 | -0.569 | 0.6127 |
| Proteobacteria | Succinivibrio   | 3  | -0.141 | 0.5836 | -0.136 | 0.5787 | -0.594 | 0.3608 |
| Proteobacteria | Sutterella      | 51 | 0.082  | 0.929  | 0.155  | 0.5828 | 0.063  | 0.9925 |
| Firmicutes     | Turicibacter    | 20 | -0.086 | 0.7467 | -0.043 | 0.9242 | -0.456 | 0.59   |
| Euryarchaeota  | vadinCA11       | 3  | -0.245 | 0.334  | -0.239 | 0.3609 | NA     | NA     |
| Actinobacteria | Varibaculum     | 2  | -0.075 | 0.4318 | -0.061 | 0.483  | NA     | NA     |
| Firmicutes     | Veillonella     | 32 | 0.266  | 0.5706 | 0.33   | 0.3726 | 0.071  | 1      |
| Firmicutes     | WAL_1855D       | 12 | -0.243 | 0.8053 | -0.248 | 0.7795 | 0.096  | 0.8551 |
| Bacteroidetes  | YRC22           | 2  | 0.166  | 0.7076 | NA     | NA     | 0.228  | 0.8375 |



**Supplementary Table 4.** Non-parametric Spearman correlation between stool consistency (BSS) and genera abundances, after multiple testing correction (Benjamini-Hochberg, q-values). Dataset with closed reference OTU assignment. Abundance of key organisms *Methanobrevibacter* and *Akkermansia* are significantly correlated with stool consistency (BSS) with this more stringent OTU assignment. The same can be said about *Butyrivimonas* and *Cloacibacillus*. The genera *Oxalobacter* and *Bacteroides* are however not significantly correlated with stool consistency (BSS) in this dataset.

| Phylum          | Genus           | N samples | total dataset |         | RB enterotype |         | P enterotype |         |
|-----------------|-----------------|-----------|---------------|---------|---------------|---------|--------------|---------|
|                 |                 |           | rho           | q value | rho           | q value | rho          | q value |
| Firmicutes      | [Eubacterium]   | 29        | -0,31         | 0,4236  | -0,31         | 0,4236  | 0,08         | 0,8924  |
| Bacteroidetes   | [Prevotella]    | 10        | 0,02          | 0,8382  | 0,02          | 0,8382  | -0,24        | 0,9667  |
| Firmicutes      | [Ruminococcus]  | 53        | -0,14         | 0,5865  | -0,14         | 0,5865  | -0,34        | 0,2966  |
| Firmicutes      | 02d06           | 5         | 0,20          | 0,4821  | 0,20          | 0,4821  | 0,19         | 0,6694  |
| Firmicutes      | 57N15           | 3         | 0,02          | 0,9536  | 0,02          | 0,9536  | NA           | NA      |
| Proteobacteria  | Acetobacter     | 1         | 0,04          | 0,8900  | 0,04          | 0,8900  | NA           | NA      |
| Firmicutes      | Acidaminococcus | 8         | -0,09         | 0,7537  | -0,09         | 0,7537  | 0,20         | 0,6556  |
| Proteobacteria  | Actinobacillus  | 2         | 0,19          | 0,4821  | 0,19          | 0,4821  | NA           | NA      |
| Actinobacteria  | Actinomyces     | 15        | -0,07         | 0,8382  | -0,07         | 0,8382  | -0,58        | 0,2966  |
| Actinobacteria  | Adlercreutzia   | 5         | -0,14         | 0,5022  | -0,14         | 0,5022  | NA           | NA      |
| Proteobacteria  | Aggregatibacter | 5         | 0,17          | 0,9475  | 0,17          | 0,9475  | 0,45         | 0,3780  |
| Verrucomicrobia | Akkermansia     | 40        | -0,51         | 0,0793  | -0,51         | 0,0793  | -0,07        | 0,5603  |

|                |                 |    |       |        |       |        |       |        |
|----------------|-----------------|----|-------|--------|-------|--------|-------|--------|
| Firmicutes     | Anaerococcus    | 1  | -0,23 | 0,4222 | -0,23 | 0,4222 | NA    | NA     |
| Firmicutes     | Anaerostipes    | 46 | -0,24 | 0,2421 | -0,24 | 0,2421 | -0,52 | 0,7483 |
| Firmicutes     | Anaerotruncus   | 25 | 0,21  | 0,2421 | 0,21  | 0,2421 | -0,19 | 0,9687 |
| Bacteroidetes  | Bacteroides     | 53 | 0,19  | 0,5145 | 0,19  | 0,5145 | -0,08 | 0,5992 |
| Actinobacteria | Bifidobacterium | 44 | -0,08 | 0,9550 | -0,08 | 0,9550 | 0,21  | 0,6556 |
| Proteobacteria | Bilophila       | 47 | -0,12 | 0,6700 | -0,12 | 0,6700 | 0,26  | 0,8159 |
| Firmicutes     | Blautia         | 53 | 0,16  | 0,8634 | 0,16  | 0,8634 | -0,44 | 0,6694 |
| Firmicutes     | Bulleidia       | 3  | -0,06 | 0,9475 | -0,06 | 0,9475 | -0,58 | 0,2966 |
| Bacteroidetes  | Butyricimonas   | 42 | -0,35 | 0,0793 | -0,35 | 0,0793 | -0,26 | 0,7483 |
| Proteobacteria | Campylobacter   | 4  | 0,08  | 0,3384 | 0,08  | 0,3384 | NA    | NA     |
| Firmicutes     | Catenibacterium | 6  | 0,06  | 0,6027 | 0,06  | 0,6027 | 0,16  | 0,8390 |
| Firmicutes     | cc_115          | 26 | -0,38 | 0,2000 | -0,38 | 0,2000 | -0,02 | 0,9667 |
| Firmicutes     | Christensenella | 10 | -0,25 | 0,2900 | -0,25 | 0,2900 | -0,06 | 0,8416 |
| Synergistetes  | Cloacibacillus  | 6  | -0,22 | 0,0793 | -0,22 | 0,0793 | NA    | NA     |
| Firmicutes     | Clostridium     | 53 | -0,15 | 0,2165 | -0,15 | 0,2165 | 0,09  | 0,8416 |
| Actinobacteria | Collinsella     | 39 | -0,07 | 0,9475 | -0,07 | 0,9475 | -0,54 | 0,6694 |
| Firmicutes     | Coprobacillus   | 10 | -0,10 | 0,6999 | -0,10 | 0,6999 | NA    | NA     |
| Firmicutes     | Coprococcus     | 53 | 0,06  | 0,5145 | 0,06  | 0,5145 | -0,58 | 0,7483 |
| Firmicutes     | Dehalobacterium | 20 | -0,28 | 0,3633 | -0,28 | 0,3633 | 0,09  | 0,5603 |
| Proteobacteria | Desulfovibrio   | 28 | -0,11 | 0,5022 | -0,11 | 0,5022 | -0,06 | 0,6556 |
| Firmicutes     | Dialister       | 31 | 0,15  | 0,5865 | 0,15  | 0,5865 | 0,29  | 0,6556 |
| Firmicutes     | Dorea           | 53 | 0,02  | 0,2652 | 0,02  | 0,2652 | -0,27 | 0,1935 |

|                |                       |    |       |        |       |        |       |        |
|----------------|-----------------------|----|-------|--------|-------|--------|-------|--------|
| Actinobacteria | Eggerthella           | 8  | 0,04  | 0,4962 | 0,04  | 0,4962 | NA    | NA     |
| Firmicutes     | Enterococcus          | 4  | 0,20  | 0,5691 | 0,20  | 0,5691 | -0,17 | 0,9667 |
| Proteobacteria | Erwinia               | 3  | -0,04 | 0,9145 | -0,04 | 0,9145 | -0,32 | 0,5172 |
| Firmicutes     | Faecalibacterium      | 53 | -0,11 | 0,5022 | -0,11 | 0,5022 | -0,07 | 0,8416 |
| Fusobacteria   | Fusobacterium         | 5  | 0,22  | 0,9475 | 0,22  | 0,9475 | -0,32 | 0,5172 |
| Firmicutes     | Granulicatella        | 9  | 0,14  | 0,5022 | 0,14  | 0,5022 | -0,10 | 0,9667 |
| Proteobacteria | Haemophilus           | 39 | 0,23  | 0,3377 | 0,23  | 0,3377 | 0,21  | 0,6548 |
| Firmicutes     | Holdemania            | 28 | -0,08 | 0,4229 | -0,08 | 0,4229 | 0,00  | 0,9667 |
| Proteobacteria | Klebsiella            | 1  | -0,05 | 0,8382 | -0,05 | 0,8382 | -0,32 | 0,5172 |
| Firmicutes     | Lachnobacterium       | 31 | -0,20 | 0,9475 | -0,20 | 0,9475 | -0,03 | 0,8416 |
| Firmicutes     | Lachnospira           | 51 | -0,14 | 0,9115 | -0,14 | 0,9115 | -0,33 | 0,5827 |
| Firmicutes     | Lactobacillus         | 16 | 0,04  | 0,9550 | 0,04  | 0,9550 | -0,06 | 0,5603 |
| Firmicutes     | Lactococcus           | 9  | -0,01 | 0,5022 | -0,01 | 0,5022 | -0,58 | 0,2966 |
| Firmicutes     | Megamonas             | 4  | 0,19  | 0,4229 | 0,19  | 0,4229 | 0,50  | 0,2966 |
| Firmicutes     | Megasphaera           | 2  | 0,01  | 0,9550 | 0,01  | 0,9550 | -0,32 | 0,5172 |
| Euryarchaeota  | Methanobrevibacter    | 24 | -0,12 | 0,0793 | -0,12 | 0,0793 | -0,22 | 0,3780 |
| Euryarchaeota  | Methanomassiliicoccus | 6  | -0,27 | 0,4962 | -0,27 | 0,4962 | -0,06 | 0,8416 |
| Euryarchaeota  | Methanosphaera        | 3  | -0,24 | 0,2421 | -0,24 | 0,2421 | NA    | NA     |
| Firmicutes     | Mitsuokella           | 3  | 0,13  | 0,8209 | 0,13  | 0,8209 | 0,19  | 0,6694 |
| Proteobacteria | Neisseria             | 4  | 0,17  | 0,5865 | 0,17  | 0,5865 | NA    | NA     |
| Bacteroidetes  | Odoribacter           | 51 | -0,34 | 0,1764 | -0,34 | 0,1764 | -0,14 | 0,8416 |
| Firmicutes     | Oribacterium          | 5  | -0,21 | 0,9755 | -0,21 | 0,9755 | 0,24  | 0,2966 |

|                |                                |    |       |        |       |        |       |        |
|----------------|--------------------------------|----|-------|--------|-------|--------|-------|--------|
| Firmicutes     | Oscillospira                   | 53 | -0,21 | 0,2421 | -0,21 | 0,2421 | -0,33 | 0,6694 |
| Proteobacteria | Oxalobacter                    | 24 | -0,40 | 0,1764 | -0,40 | 0,1764 | -0,01 | 0,7483 |
| Firmicutes     | p-75-a5                        | 1  | -0,05 | 0,8382 | -0,05 | 0,8382 | -0,32 | 0,5172 |
| Bacteroidetes  | Parabacteroides                | 50 | -0,04 | 0,2421 | -0,04 | 0,2421 | -0,16 | 0,6556 |
| Bacteroidetes  | Paraprevotella                 | 24 | 0,12  | 0,9475 | 0,12  | 0,9475 | 0,21  | 0,9667 |
| Firmicutes     | Pediococcus                    | 1  | 0,04  | 0,8900 | 0,04  | 0,8900 | 0,27  | 0,8416 |
| Firmicutes     | Peptococcus                    | 5  | -0,05 | 0,8015 | -0,05 | 0,8015 | -0,19 | 0,5848 |
| Firmicutes     | Phascolarctobacterium          | 33 | -0,05 | 0,8558 | -0,05 | 0,8558 | -0,39 | 0,6342 |
| Bacteroidetes  | Porphyromonas                  | 7  | -0,27 | 0,6027 | -0,27 | 0,6027 | -0,06 | 0,8416 |
| Bacteroidetes  | Prevotella                     | 50 | 0,27  | 0,9475 | 0,27  | 0,9475 | 0,36  | 0,5172 |
| Proteobacteria | Proteus                        | 1  | 0,22  | 0,4222 | 0,22  | 0,4222 | NA    | NA     |
| Proteobacteria | Pseudomonas                    | 2  | -0,14 | 0,6700 | -0,14 | 0,6700 | NA    | NA     |
| Firmicutes     | Pseudoramibacter - Eubacterium | 1  | -0,23 | 0,4222 | -0,23 | 0,4222 | NA    | NA     |
| Proteobacteria | Ralstonia                      | 1  | 0,04  | 0,8900 | 0,04  | 0,8900 | NA    | NA     |
| Firmicutes     | rc4-4                          | 16 | -0,11 | 0,9475 | -0,11 | 0,9475 | -0,61 | 0,4392 |
| Bacteroidetes  | Rikenella                      | 2  | 0,05  | 0,4821 | 0,05  | 0,4821 | NA    | NA     |
| Firmicutes     | Roseburia                      | 53 | 0,27  | 0,2421 | 0,27  | 0,2421 | -0,61 | 0,1913 |
| Actinobacteria | Rothia                         | 3  | -0,09 | 0,6602 | -0,09 | 0,6602 | NA    | NA     |
| Firmicutes     | Ruminococcus                   | 53 | -0,24 | 0,2950 | -0,24 | 0,2950 | -0,02 | 0,6556 |
| Proteobacteria | Salmonella                     | 3  | 0,00  | 0,9414 | 0,00  | 0,9414 | -0,32 | 0,5172 |
| Firmicutes     | Sarcina                        | 6  | -0,23 | 0,5611 | -0,23 | 0,5611 | 0,19  | 0,6694 |
| Proteobacteria | Serratia                       | 8  | 0,04  | 0,8900 | 0,04  | 0,8900 | -0,12 | 0,7665 |

|                |                  |    |       |        |       |        |       |        |
|----------------|------------------|----|-------|--------|-------|--------|-------|--------|
| Actinobacteria | Slackia          | 10 | -0,31 | 0,2421 | -0,31 | 0,2421 | NA    | NA     |
| Firmicutes     | SMB53            | 17 | 0,18  | 0,6700 | 0,18  | 0,6700 | -0,54 | 0,2966 |
| Fusobacteria   | Sneathia         | 3  | -0,23 | 0,8382 | -0,23 | 0,8382 | -0,06 | 0,8416 |
| Firmicutes     | Streptococcus    | 45 | 0,32  | 0,2421 | 0,32  | 0,2421 | -0,15 | 0,8416 |
| Firmicutes     | Succiniclasticum | 7  | -0,13 | 0,9791 | -0,13 | 0,9791 | -0,56 | 0,5992 |
| Proteobacteria | Succinivibrio    | 3  | -0,14 | 0,2421 | -0,14 | 0,2421 | -0,58 | 0,2966 |
| Proteobacteria | Sutterella       | 51 | 0,09  | 0,7517 | 0,09  | 0,7517 | 0,04  | 0,8416 |
| Firmicutes     | Turicibacter     | 21 | -0,05 | 0,8128 | -0,05 | 0,8128 | 0,08  | 0,7920 |
| Euryarchaeota  | vadinCA11        | 3  | -0,22 | 0,2638 | -0,22 | 0,2638 | NA    | NA     |
| Actinobacteria | Varibaculum      | 2  | -0,05 | 0,9550 | -0,05 | 0,9550 | NA    | NA     |
| Firmicutes     | Veillonella      | 30 | 0,27  | 0,4962 | 0,27  | 0,4962 | 0,21  | 0,7665 |
| Firmicutes     | WAL_1855D        | 6  | -0,24 | 0,4620 | -0,24 | 0,4620 | NA    | NA     |
| Bacteroidetes  | YRC22            | 2  | 0,16  | 0,7094 | 0,16  | 0,7094 | 0,20  | 0,8416 |

**Supplementary Table 5.** Correlations of growth rate and stool consistency on the dataset with closed reference OTU assignment. The difference between the median microbiota growth potential

|                                                                               | <b>RB enterotype</b>      | <b>P enterotype</b>      |
|-------------------------------------------------------------------------------|---------------------------|--------------------------|
| Correlation of microbiota growth potential with stool consistency score (BSS) | rho= 0.35, p-value= 0.023 | rho= 0.47, p-value= 0.12 |
| Median microbiota growth potential                                            | 0.37 h <sup>-1</sup> *    | 0.51 h <sup>-1</sup> *   |

Median relative abundance of  
Prevotella

0.48314

0.00034

\* Wilcoxon test p-value <  $10^{-4}$
